# Supplementary material for: Household catastrophic health expenditures for rheumatoid arthritis: a single centre study from South India
Source: PubMed Central journal article supplement (PMC10505146; doi:10.1038/s41598-023-42623-y), 2023-09-16
Supplement: 41598_2023_42623_MOESM1_ESM.pdf [file 41598_2023_42623_MOESM1_ESM.pdf]

## **Online Supplementary Material**

*Of the manuscript:* Bagepally et al., Household Catastrophic Health Expenditures for Rheumatoid Arthritis: A Single Centre study from South India

### **Contents**

|                                                       |   |
|-------------------------------------------------------|---|
| Supplementary table 1: Estimated cost components..... | 2 |
| CHEERS 2022 Checklist.....                            | 3 |
| STROBE Statement—Checklist.....                       | 5 |

### Supplementary table 1: Estimated cost components

| <b>Variable</b>         | <b>Mean</b> | <b>Std. Err.</b> | <b>95% Conf interval</b> |         |
|-------------------------|-------------|------------------|--------------------------|---------|
| Household Annual income | 710492      | 86550            | 540155                   | 880828  |
| Direct medical cost     | 40698       | 1245             | 38249                    | 43148   |
| Direct non-medical cost | 4363        | 829              | 2730                     | 5995    |
| Total Direct cost       | 44603       | 1516             | 41620                    | 47586   |
| Drug cost               | 31786.7     | 1196.4           | 29432.6                  | 34140.7 |
| Lab test cost           | 6468        | 198              | 6078                     | 6858    |
| Physician fee           | 1949        | 62               | 1828                     | 2070    |
| Transport cost          | 3271        | 706              | 1882                     | 4660    |
| Food cost               | 443         | 62               | 321                      | 564     |

## CHEERS 2022 Checklist

| Topic                                                                 | No. | Item                                                                                                                                                                          | Location where item is reported |
|-----------------------------------------------------------------------|-----|-------------------------------------------------------------------------------------------------------------------------------------------------------------------------------|---------------------------------|
|                                                                       | 1   | Identify the study as an economic evaluation and specify the interventions being compared.                                                                                    | NA                              |
|                                                                       | 2   | Provide a structured summary that highlights context, key methods, results, and alternative analyses.                                                                         | 2                               |
| <b>Introduction</b>                                                   |     |                                                                                                                                                                               |                                 |
| Background and objectives                                             | 3   | Give the context for the study, the study question, and its practical relevance for decision making in policy or practice.                                                    | 3                               |
| <b>Methods</b>                                                        |     |                                                                                                                                                                               |                                 |
| Health economic analysis plan                                         | 4   | Indicate whether a health economic analysis plan was developed and where available.                                                                                           | NA                              |
| Study population                                                      | 5   | Describe characteristics of the study population (such as age range, demographics, socioeconomic, or clinical characteristics).                                               | 4                               |
| Setting and location                                                  | 6   | Provide relevant contextual information that may influence findings.                                                                                                          | 4                               |
| Comparators                                                           | 7   | Describe the interventions or strategies being compared and why chosen.                                                                                                       | NA                              |
| Perspective                                                           | 8   | State the perspective(s) adopted by the study and why chosen.                                                                                                                 | 4                               |
| Time horizon                                                          | 9   | State the time horizon for the study and why appropriate.                                                                                                                     | 4                               |
| Discount rate                                                         | 10  | Report the discount rate(s) and reason chosen.                                                                                                                                | NA                              |
| Selection of outcomes                                                 | 11  | Describe what outcomes were used as the measure(s) of benefit(s) and harm(s).                                                                                                 | 5                               |
| Measurement of outcomes                                               | 12  | Describe how outcomes used to capture benefit(s) and harm(s) were measured.                                                                                                   | 5                               |
| Valuation of outcomes                                                 | 13  | Describe the population and methods used to measure and value outcomes.                                                                                                       | 5                               |
| Measurement and valuation of resources and costs                      | 14  | Describe how costs were valued.                                                                                                                                               | 5                               |
| Currency, price date, and conversion                                  | 15  | Report the dates of the estimated resource quantities and unit costs, plus the currency and year of conversion.                                                               | 4                               |
| Rationale and description of model                                    | 16  | If modelling is used, describe in detail and why used. Report if the model is publicly available and where it can be accessed.                                                | NA                              |
| Analytics and assumptions                                             | 17  | Describe any methods for analysing or statistically transforming data, any extrapolation methods, and approaches for validating any model used.                               | NA                              |
| Characterising heterogeneity                                          | 18  | Describe any methods used for estimating how the results of the study vary for subgroups.                                                                                     | 5                               |
| Characterising distributional effects                                 | 19  | Describe how impacts are distributed across different individuals or adjustments made to reflect priority populations.                                                        | 5                               |
| Characterising uncertainty                                            | 20  | Describe methods to characterise any sources of uncertainty in the analysis.                                                                                                  | NA                              |
| Approach to engagement with patients and others affected by the study | 21  | Describe any approaches to engage patients or service recipients, the general public, communities, or stakeholders (such as clinicians or payers) in the design of the study. | 5                               |
| <b>Results</b>                                                        |     |                                                                                                                                                                               |                                 |
| Study parameters                                                      | 22  | Report all analytic inputs (such as values, ranges, references) including uncertainty or distributional assumptions.                                                          | 5-7                             |
| Summary of main results                                               | 23  | Report the mean values for the main categories of costs and outcomes of interest and summarise them in the most appropriate overall measure.                                  | 5-6                             |
| Effect of uncertainty                                                 | 24  | Describe how uncertainty about analytic judgments, inputs, or projections affect findings. Report the effect of choice of discount rate and time horizon, if applicable.      | 7                               |
| Effect of engagement with patients and others affected by the study   | 25  | Report on any difference patient/service recipient, general public, community, or stakeholder involvement made to the approach or findings of the study                       | NA                              |

| Topic                                                                | No. | Item                                                                                                                                       | Location where item is reported |
|----------------------------------------------------------------------|-----|--------------------------------------------------------------------------------------------------------------------------------------------|---------------------------------|
| <b>Discussion</b>                                                    |     |                                                                                                                                            |                                 |
| Study findings, limitations, generalisability, and current knowledge | 26  | Report key findings, limitations, ethical or equity considerations not captured, and how these could affect patients, policy, or practice. | 7-8                             |
| <b>Other relevant information</b>                                    |     |                                                                                                                                            |                                 |
| Source of funding                                                    | 27  | Describe how the study was funded and any role of the funder in the identification, design, conduct, and reporting of the analysis         | 1                               |
| Conflicts of interest                                                | 28  | Report authors conflicts of interest according to journal or International Committee of Medical Journal Editors requirements.              | 11                              |

*From:* Husereau D, Drummond M, Augustovski F, et al. Consolidated Health Economic Evaluation Reporting Standards 2022 (CHEERS 2022) Explanation and Elaboration: A Report of the ISPOR CHEERS II Good Practices Task Force. Value Health 2022;25. doi:10.1016/j.jval.2021.10.008

## STROBE Statement—Checklist

|                              | Item No | Recommendation                                                                                                                                                                                               | Page No |
|------------------------------|---------|--------------------------------------------------------------------------------------------------------------------------------------------------------------------------------------------------------------|---------|
| <b>Title and abstract</b>    | 1       | (a) Indicate the study's design with a commonly used term in the title or the abstract                                                                                                                       | 1,2     |
|                              |         | (b) Provide in the abstract an informative and balanced summary of what was done and what was found                                                                                                          | 2       |
| <b>Introduction</b>          |         |                                                                                                                                                                                                              |         |
| Background/rationale         | 2       | Explain the scientific background and rationale for the investigation being reported                                                                                                                         | 3       |
| Objectives                   | 3       | State specific objectives, including any prespecified hypotheses                                                                                                                                             | 3       |
| <b>Methods</b>               |         |                                                                                                                                                                                                              |         |
| Study design                 | 4       | Present key elements of study design early in the paper                                                                                                                                                      | 4       |
| Setting                      | 5       | Describe the setting, locations, and relevant dates, including periods of recruitment, exposure, follow-up, and data collection                                                                              | 4       |
| Participants                 | 6       | (a) Give the eligibility criteria, and the sources and methods of selection of participants                                                                                                                  | 4       |
| Variables                    | 7       | Clearly define all outcomes, exposures, predictors, potential confounders, and effect modifiers. Give diagnostic criteria, if applicable                                                                     | 4-5     |
| Data sources/<br>measurement | 8*      | For each variable of interest, give sources of data and details of methods of assessment (measurement). Describe comparability of assessment methods if there is more than one group                         | 5       |
| Bias                         | 9       | Describe any efforts to address potential sources of bias                                                                                                                                                    | NA      |
| Study size                   | 10      | Explain how the study size was arrived at                                                                                                                                                                    | 4       |
| Quantitative variables       | 11      | Explain how quantitative variables were handled in the analyses. If applicable, describe which groupings were chosen and why                                                                                 | 5       |
| Statistical methods          | 12      | (a) Describe all statistical methods, including those used to control for confounding                                                                                                                        | 5       |
|                              |         | (b) Describe any methods used to examine subgroups and interactions                                                                                                                                          | 5       |
|                              |         | (c) Explain how missing data were addressed                                                                                                                                                                  | 4       |
|                              |         | (d) If applicable, describe analytical methods taking account of sampling strategy                                                                                                                           | NA      |
|                              |         | (e) Describe any sensitivity analyses                                                                                                                                                                        | 5       |
| <b>Results</b>               |         |                                                                                                                                                                                                              |         |
| Participants                 | 13*     | (a) Report numbers of individuals at each stage of study—eg numbers potentially eligible, examined for eligibility, confirmed eligible, included in the study, completing follow-up, and analysed            | 5       |
|                              |         | (b) Give reasons for non-participation at each stage                                                                                                                                                         | NA      |
|                              |         | (c) Consider use of a flow diagram                                                                                                                                                                           |         |
| Descriptive data             | 14*     | (a) Give characteristics of study participants (eg demographic, clinical, social) and information on exposures and potential confounders                                                                     | 5       |
|                              |         | (b) Indicate number of participants with missing data for each variable of interest                                                                                                                          | NA      |
| Outcome data                 | 15*     | Report numbers of outcome events or summary measures                                                                                                                                                         | 5-7     |
| Main results                 | 16      | (a) Give unadjusted estimates and, if applicable, confounder-adjusted estimates and their precision (eg, 95% confidence interval). Make clear which confounders were adjusted for and why they were included | 5-7     |
|                              |         | (b) Report category boundaries when continuous variables were categorized                                                                                                                                    | 5-6     |
|                              |         | (c) If relevant, consider translating estimates of relative risk into absolute risk for a meaningful time period                                                                                             | 5-6     |
| Other analyses               | 17      | Report other analyses done—eg analyses of subgroups and interactions, and sensitivity analyses                                                                                                               | 6       |
| <b>Discussion</b>            |         |                                                                                                                                                                                                              |         |
| Key results                  | 18      | Summarise key results with reference to study objectives                                                                                                                                                     | 7       |
| Limitations                  | 19      | Discuss limitations of the study, taking into account sources of potential bias or imprecision. Discuss both direction and magnitude of any potential bias                                                   | 9       |
| Interpretation               | 20      | Give a cautious overall interpretation of results considering objectives, limitations, multiplicity of analyses, results from similar studies, and other relevant evidence                                   | 7-8     |
| Generalisability             | 21      | Discuss the generalisability (external validity) of the study results                                                                                                                                        | 8       |
| <b>Other information</b>     |         |                                                                                                                                                                                                              |         |
| Funding                      | 22      | Give the source of funding and the role of the funders for the present study and, if applicable, for the original study on which the present article is based                                                | 1       |

\*Give information separately for exposed and unexposed groups.

The STROBE checklist is best used in conjunction with this article (freely available on the Web sites of PLoS Medicine at <http://www.plosmedicine.org/>, Annals of Internal Medicine at <http://www.annals.org/>, and Epidemiology at <http://www.epidem.com/>). Information on the STROBE Initiative is available at [www.strobe-statement.org](http://www.strobe-statement.org).
